# Supplementary material for: Metabolic profiling reveals the heterogeneity of vascular endothelial function phenotypes in individuals at extreme cardiovascular risk
Source: Royal Society of Chemistry journal article supplement (doi:10.1039/c9ra05526f), 2019-01-01
Supplement: c9ra05526f1.pdf [file c9ra05526f1.pdf]

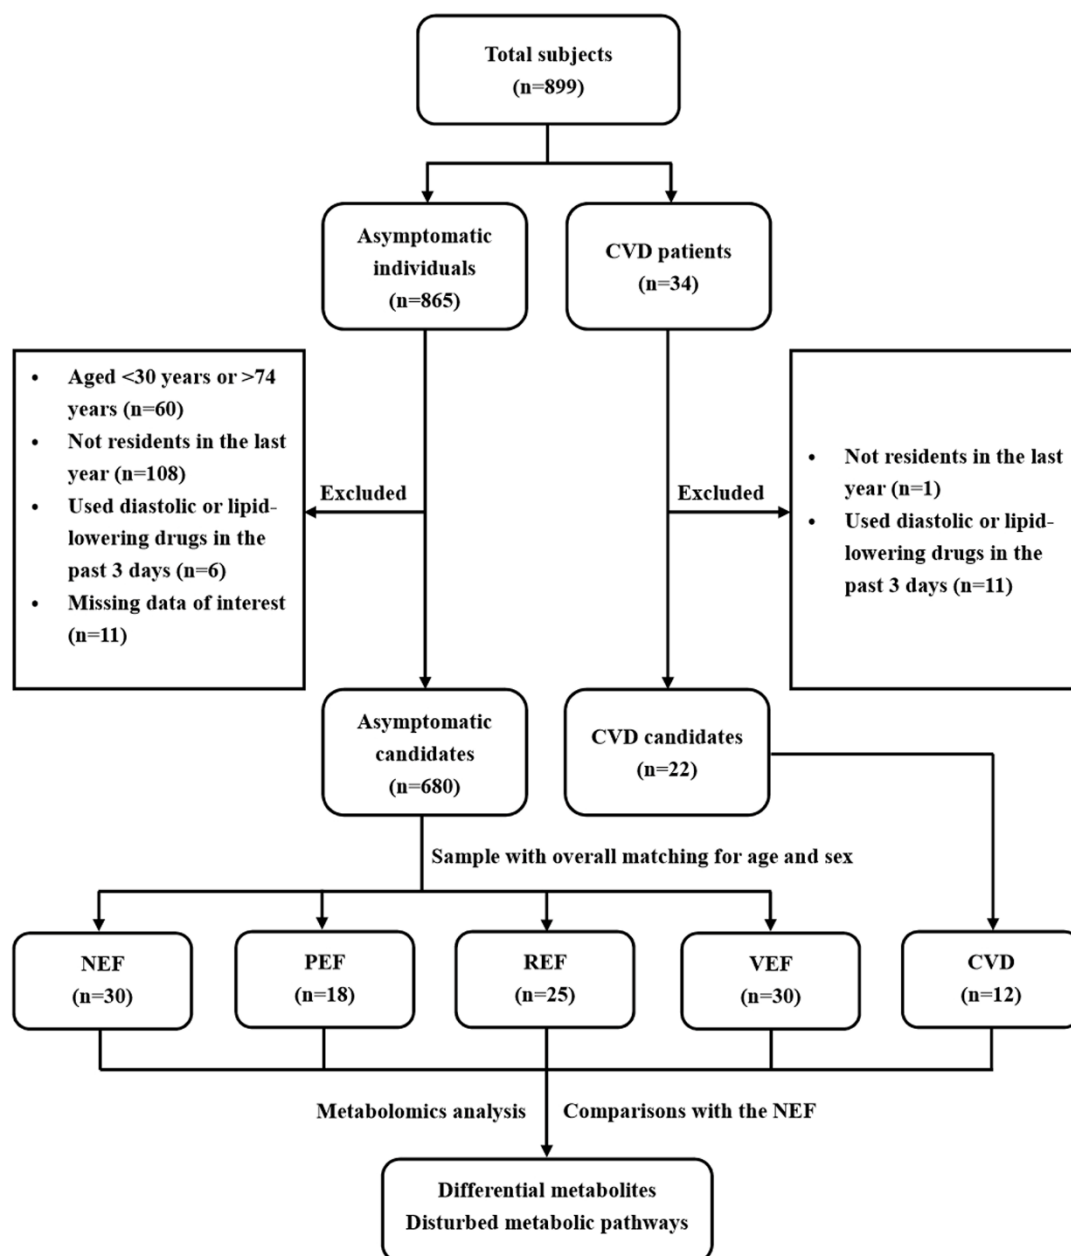

**ESI Fig. 1.** The selection criteria for the study population and flow diagram of the selection process. NEF, normal endothelial function; PEF, cardiovascular risk-promoting endothelial function; REF, cardiovascular risk-resistant endothelial function; VEF, vulnerable endothelial function; CVD, cardiovascular disease.

**ESI Table 1.** Characteristics of the study participants by different endothelial phenotypes

|                               | NEF (n=30)                  | PEF (n=18)           | REF (n=25)           | VEF (n=30)        | CVD (n=12)           | <i>P</i> Value <sup>d</sup> |
|-------------------------------|-----------------------------|----------------------|----------------------|-------------------|----------------------|-----------------------------|
| Age, y                        | 55.3 (1.1) <sup>a</sup>     | 58.4 (1.9)           | 59.4 (1.3)           | 55.9 (1.1)        | 63.1 (2.8)           | 0.02                        |
| Male, %                       | 40.0 (0.09) <sup>b</sup>    | 66.7 (0.11)          | 64.0 (0.10)          | 36.7 (0.09)       | 33.3 (0.14)          | 0.08                        |
| High school education, %      | 16.7 (0.07)                 | 16.7 (0.09)          | 16.0 (0.07)          | 20.0 (0.07)       | 0                    | 0.62                        |
| Race/ethnicity, %             |                             |                      |                      |                   |                      | 0.68                        |
| Han                           | 26.7 (0.08)                 | 33.3 (0.11)          | 20.0 (0.08)          | 16.7 (0.07)       | 25.0 (0.12)          |                             |
| Zhuang                        | 53.3 (0.09)                 | 33.3 (0.11)          | 56.0 (0.10)          | 66.7 (0.09)       | 58.3 (0.14)          |                             |
| Other                         | 20.0 (0.07)                 | 33.4 (0.11)          | 24.0 (0.09)          | 16.6 (0.07)       | 16.7 (0.11)          |                             |
| Current smoking, %            | 10.0 (0.05)                 | 55.6 (0.12)          | 52.0 (0.10)          | 6.7 (0.05)        | 8.3 (0.08)           | <0.001                      |
| BMI, kg/m <sup>2</sup>        | 22.0 (0.5)                  | 24.3 (1.1)           | 23.4 (0.6)           | 21.9 (0.5)        | 24.0 (1.1)           | 0.03                        |
| Systolic blood pressure, mmHg | 121.4 (2.6)                 | 158.5 (6.4)          | 150.6 (4.9)          | 120.2 (2.4)       | 134.9 (5.3)          | <0.001                      |
| Heart rate, beat per minute   | 70.1 (1.5)                  | 70.2 (2.6)           | 75.5 (2.8)           | 65.9 (1.6)        | 73.9 (2.8)           | 0.04                        |
| Serum CRP, mg/L               | 7.9 (6.4, 9.7) <sup>c</sup> | 10.4 (5.5, 20.0)     | 9.4 (5.9, 14.9)      | 7.6 (6.5, 9.0)    | 11.7 (8.0, 16.9)     | 0.02                        |
| Total cholesterol, mg/dL      | 185.4 (6.8)                 | 219.9 (8.7)          | 285.3 (28.1)         | 183.7 (5.0)       | 210.3 (13.4)         | <0.001                      |
| Triglyceride, mg/dL           | 89.8 (73.3, 109.9)          | 208.9 (140.3, 311.1) | 176.6 (121.8, 256.2) | 81.2 (66.3, 99.6) | 185.0 (128.2, 267.1) | <0.001                      |
| LDL cholesterol, mg/dL        | 97.4 (4.9)                  | 117.4 (6.5)          | 156.8 (19.8)         | 97.3 (3.9)        | 110.2 (9.5)          | <0.001                      |
| HDL cholesterol, mg/dL        | 57.1 (2.2)                  | 44.5 (3.1)           | 53.2 (2.7)           | 58.5 (2.3)        | 50.1 (4.3)           | 0.01                        |
| Diabetes, %                   | 6.7 (0.05)                  | 16.7 (0.09)          | 16.0 (0.07)          | 0                 | 25.0 (0.12)          | 0.04                        |
| FRS, % risk/10 years          | 6.0 (5.4, 6.6)              | 29.8 (25.5, 34.8)    | 29.0 (24.9, 33.9)    | 5.4 (4.7, 6.3)    | NA                   | <0.001                      |
| FMD, %                        | 12.8 (11.9, 13.8)           | 4.4 (3.6, 5.3)       | 11.8 (10.8, 12.9)    | 4.0 (3.4, 4.7)    | 7.8 (5.4, 11.2)      | <0.001                      |

<sup>a</sup> Mean (standard error) for continuous variables with normal distribution.

<sup>b</sup> Percent (standard error) for categorical variables.

<sup>c</sup> Geometric mean (95% CI) for continuous variables with nonnormal distribution.

<sup>d</sup> *P* value is calculated using the Wilcoxon signed-rank test for the continuous variable, using  $\chi^2$  analysis or Fisher's exact test when the variable is categorical.

BMI, body mass index; CRP, C-reactive protein; LDL, low-density lipoprotein; HDL, high-density lipoprotein; FRS, Framingham risk score; FMD, flow-mediated

vasodilation; NEF, normal endothelial function; PEF, cardiovascular risk-promoting endothelial function; REF, cardiovascular risk-resistant endothelial function; VEF, vulnerable endothelial function; CVD, cardiovascular disease.

**ESI Table 2.** The parameters for the OPLS-DA modeling quality by comparison groups

| Comparison groups | N  | R <sup>2</sup> X (cum) | R <sup>2</sup> Y (cum) | Q <sup>2</sup> (cum) |
|-------------------|----|------------------------|------------------------|----------------------|
| PEF versus NEF    | 48 | 0.133                  | 0.983                  | 0.892                |
| REF versus NEF    | 55 | 0.124                  | 0.925                  | 0.697                |
| VEF versus NEF    | 60 | 0.131                  | 0.965                  | 0.835                |
| CVD versus NEF    | 42 | 0.14                   | 0.983                  | 0.866                |

OPLS-DA, orthogonal projections to latent structures discriminant analysis.

**ESI Table 3.** ROC analysis of altered metabolic pathways

| Pathway                                | Metabolites (Fold Change) <sup>a</sup> | Combination             | AUC (95% CI)         | Sensitivity (%) | Specificity (%) | <i>P</i> Value <sup>b</sup> |
|----------------------------------------|----------------------------------------|-------------------------|----------------------|-----------------|-----------------|-----------------------------|
| PEF versus NEF                         |                                        |                         |                      |                 |                 |                             |
| Pyrimidine metabolism                  | urea (↑)                               | metabolites             | 1.000 (1.000, 1.000) | 100.0           | 100.0           | 1.00                        |
|                                        | 3-aminoisobutyric acid (↓)             |                         |                      |                 |                 |                             |
|                                        | thymidine (↓)                          | metabolites + age + sex | 1.000 (1.000, 1.000) | 100.0           | 100.0           |                             |
| Starch and sucrose metabolism          | sucrose (↓)                            | metabolites             | 0.998 (0.993, 1.000) | 100.0           | 96.7            | 0.48                        |
|                                        | fructose (↓)                           | metabolites + age + sex | 1.000 (1.000, 1.000) | 100.0           | 100.0           |                             |
| Aminoacyl-tRNA biosynthesis            | tryptophan (↓)                         | metabolites             | 0.989 (0.966, 1.000) | 100.0           | 96.7            | 0.34                        |
|                                        | glutamic acid (↓)                      | metabolites + age + sex | 1.000 (1.000, 1.000) | 100.0           | 100.0           |                             |
| Arginine and proline metabolism        | urea (↑)                               | metabolites             | 0.982 (0.944, 1.000) | 100.0           | 96.7            | 0.37                        |
|                                        | glutamic acid (↓)                      | metabolites + age + sex | 0.991 (0.971, 1.000) | 100.0           | 96.7            |                             |
| D-glutamine and D-glutamate metabolism | glutamic acid (↓)                      | metabolites             | 0.758 (0.608, 0.909) | 66.7            | 83.7            | 0.09                        |
|                                        |                                        | metabolites + age + sex | 0.870 (0.758, 0.983) | 77.8            | 86.7            |                             |
| REF versus NEF                         |                                        |                         |                      |                 |                 |                             |
| Galactose metabolism                   | tagatose (↑)                           | metabolites             | 0.999 (0.995, 1.000) | 100.0           | 96.7            | 0.48                        |
|                                        | sucrose (↓)                            |                         |                      |                 |                 |                             |
|                                        | galactonic acid (↓)                    | metabolites + age + sex | 1.000 (1.000, 1.000) | 100.0           | 100.0           |                             |
| VEF versus NEF                         |                                        |                         |                      |                 |                 |                             |
| Pyrimidine metabolism                  | urea (↑)                               | metabolites             | 0.929 (0.865, 0.993) | 96.7            | 76.7            | 1.00                        |
|                                        | uridine (↑)                            |                         |                      |                 |                 |                             |
|                                        | 3-ureidopropionate (↓)                 | metabolites + age + sex | 0.929 (0.866, 0.992) | 96.7            | 76.7            |                             |

|                                             |                            |                         |                      |       |       |      |
|---------------------------------------------|----------------------------|-------------------------|----------------------|-------|-------|------|
| Pantothenate and CoA biosynthesis           | valine (↓)                 | metabolites             | 0.779 (0.654, 0.903) | 80.0  | 73.3  | 1.00 |
|                                             | 3-ureidopropionate (↓)     | metabolites + age + sex | 0.779 (0.655, 0.903) | 86.7  | 66.7  |      |
| Butanoate metabolism                        | maleic acid (↑)            | metabolites             | 0.734 (0.603, 0.866) | 80.0  | 70.0  | 0.37 |
|                                             | 4-hydroxybutyrate (↑)      | metabolites + age + sex | 0.747 (0.616, 0.877) | 80.0  | 73.3  |      |
| Starch and sucrose metabolism               | sucrose (↓)                | metabolites             | 0.996 (0.987, 1.000) | 96.7  | 96.7  | 0.34 |
|                                             | fructose (↓)               | metabolites + age + sex | 0.999 (0.996, 1.000) | 100.0 | 96.7  |      |
| CVD versus NEF                              |                            |                         |                      |       |       |      |
| Pyrimidine metabolism                       | urea (↑)                   | metabolites             | 0.994 (0.981, 1.000) | 100.0 | 93.3  | 0.41 |
|                                             | 3-aminoisobutyric acid (↓) | metabolites + age + sex | 1.000 (1.000, 1.000) | 100.0 | 100.0 |      |
|                                             | thymidine (↓)              | metabolites + age + sex | 1.000 (1.000, 1.000) | 100.0 | 100.0 |      |
| Alanine, aspartate and glutamate metabolism | oxalacetic acid (↓)        | metabolites             | 0.850 (0.697, 1.000) | 83.3  | 86.7  | 0.36 |
|                                             | glutamic acid (↓)          | metabolites + age + sex | 0.906 (0.809, 1.000) | 83.3  | 86.7  |      |
| Pyruvate metabolism                         | lactic acid (↓)            | metabolites             | 0.800 (0.665, 0.935) | 91.7  | 63.3  | 0.42 |
|                                             | oxalacetic acid (↓)        | metabolites + age + sex | 0.844 (0.727, 0.962) | 100.0 | 63.3  |      |
| Starch and sucrose metabolism               | sucrose (↓)                | metabolites             | 1.000 (1.000, 1.000) | 100.0 | 100.0 | 1.00 |
|                                             | fructose (↓)               | metabolites + age + sex | 1.000 (1.000, 1.000) | 100.0 | 100.0 |      |
| Aminoacyl-tRNA biosynthesis                 | tryptophan (↓)             | metabolites             | 0.994 (0.981, 1.000) | 100.0 | 96.7  | 0.48 |
|                                             | glutamic acid (↓)          | metabolites + age + sex | 0.997 (0.990, 1.000) | 100.0 | 96.7  |      |
|                                             | urea (↑)                   | metabolites             | 0.989 (0.965, 1.000) | 100.0 | 96.7  |      |

|                                        |                   |                         |                      |       |      |      |
|----------------------------------------|-------------------|-------------------------|----------------------|-------|------|------|
| Arginine and proline metabolism        | glutamic acid (↓) | metabolites + age + sex | 0.997 (0.990, 1.000) | 100.0 | 96.7 |      |
| D-glutamine and D-glutamate metabolism | glutamic acid (↓) | metabolites             | 0.810 (0.637, 0.983) | 83.3  | 86.7 |      |
|                                        |                   | metabolites + age + sex | 0.897 (0.797, 0.997) | 83.3  | 86.7 | 0.19 |

<sup>a</sup> (↑) represents fold change >1, while (↓) represents fold change <1.

<sup>b</sup> *P* value is calculated using the z test.

ROC, receiver operating characteristic; AUC, area under the curve.
